# Supplementary material for: Geobarrettin D, a Rare Herbipoline-Containing 6-Bromoindole Alkaloid from Geodia barretti
Source: MDPI journal article supplement (doi:10.3390/molecules28072937), 2023-03-24
Supplement: s1 [file s1]

# Supporting Information

## Geobarrettin D, a Rare Herbipoline-Containing 6-Bromoindole Alkaloid from *Geodia barretti*

Xiaxia Di <sup>1,2,†</sup>, Ingibjorg Hardardottir <sup>2,3</sup>, Jona Freysdottir <sup>2,3</sup>, Dongdong Wang <sup>4</sup>,  
Kirk R. Gustafson <sup>4</sup>, Sesselja Omarsdottir <sup>1,\*</sup> and Tadeusz F. Molinski <sup>5,\*</sup>

<sup>1</sup> Faculty of Pharmaceutical Sciences, University of Iceland, Hagi,  
Hofsvallagata 53, IS-107 Reykjavik, Iceland

<sup>2</sup> Department of Immunology, Landspítali – The National University Hospital  
of Iceland, IS-101 Reykjavik, Iceland

<sup>3</sup> Faculty of Medicine, Biomedical Center, University of Iceland,  
Vatnsmyrarvegur 16, IS-101 Reykjavik, Iceland

<sup>4</sup> Molecular Targets Program, Center for Cancer Research, National Cancer  
Institute, Frederick, MD 21702, USA

<sup>5</sup> Department of Chemistry and Biochemistry, Skaggs School of Pharmacy and  
Pharmaceutical Sciences, University of California, San Diego, CA 92093, USA

\* Correspondence: sesselo@hi.is (S.O.); tmolinski@ucsd.edu (T.F.M.);  
Tel.: +354-842-4514 (S.O.); +1-858-534-7115 (T.F.M.)

† Current address: Departments of Biochemistry and Biomedical Sciences &  
Chemistry and Chemical Biology, M. G. DeGroote Institute for Infectious  
Disease Research, McMaster University, Hamilton, ON L8S 4K1, Canada

Figure S1.  $^1\text{H}$  NMR spectrum of geobarrettin D (**1**), recorded in  $\text{CD}_3\text{OD}$ , 600 MHz

Figure S2.  $^{13}\text{C}$  NMR spectrum of geobarrettin D (**1**), recorded in  $\text{CD}_3\text{OD}$ , 150 MHz

Figure S3. DEPT-135 NMR spectrum of geobarrettin D (**1**)

Figure S4. HSQC spectrum of geobarrettin D (**1**)

Figure S5. HMBC spectrum of geobarrettin D (**1**)

Figure S6. COSY spectrum of geobarrettin D (**1**)

Figure S7.  $^1\text{H}$  NMR spectrum of geobarrettin D (**1**), recorded in  $\text{D}_2\text{O}/\text{H}_2\text{O}$  10/90, 600 MHz

Figure S8.  $^1\text{H}$ - $^{15}\text{N}$  HSQC spectrum of geobarrettin D (**1**), recorded in  $\text{D}_2\text{O}/\text{H}_2\text{O}$  10/90

Figure S9.  $^1\text{H}$ - $^{15}\text{N}$  HMBC spectrum of geobarrettin D (**1**), recorded in  $\text{D}_2\text{O}/\text{H}_2\text{O}$  10/90

Figure S10. ESI spectrum of geobarrettin D (**1**)

Figure S11. IR spectrum of geobarrettin D (**1**)

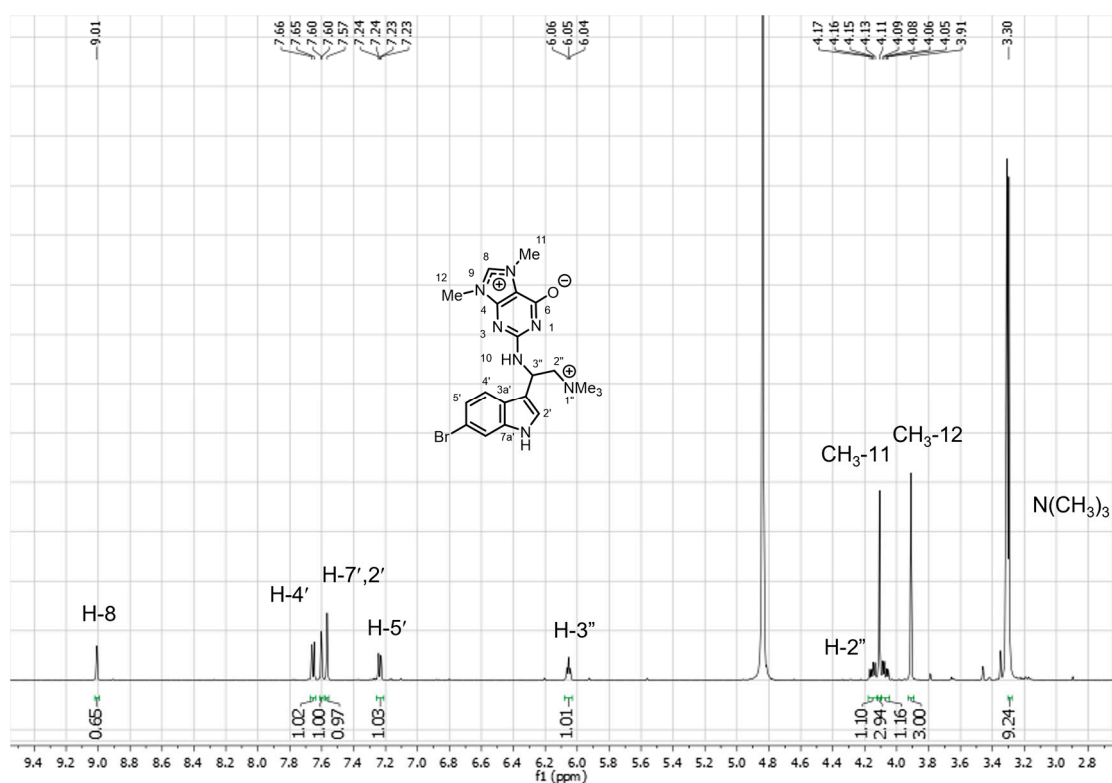

**Figure S1.** <sup>1</sup>H NMR spectrum of geobarrettin D (**1**), recorded in CD<sub>3</sub>OD, 600 MHz.

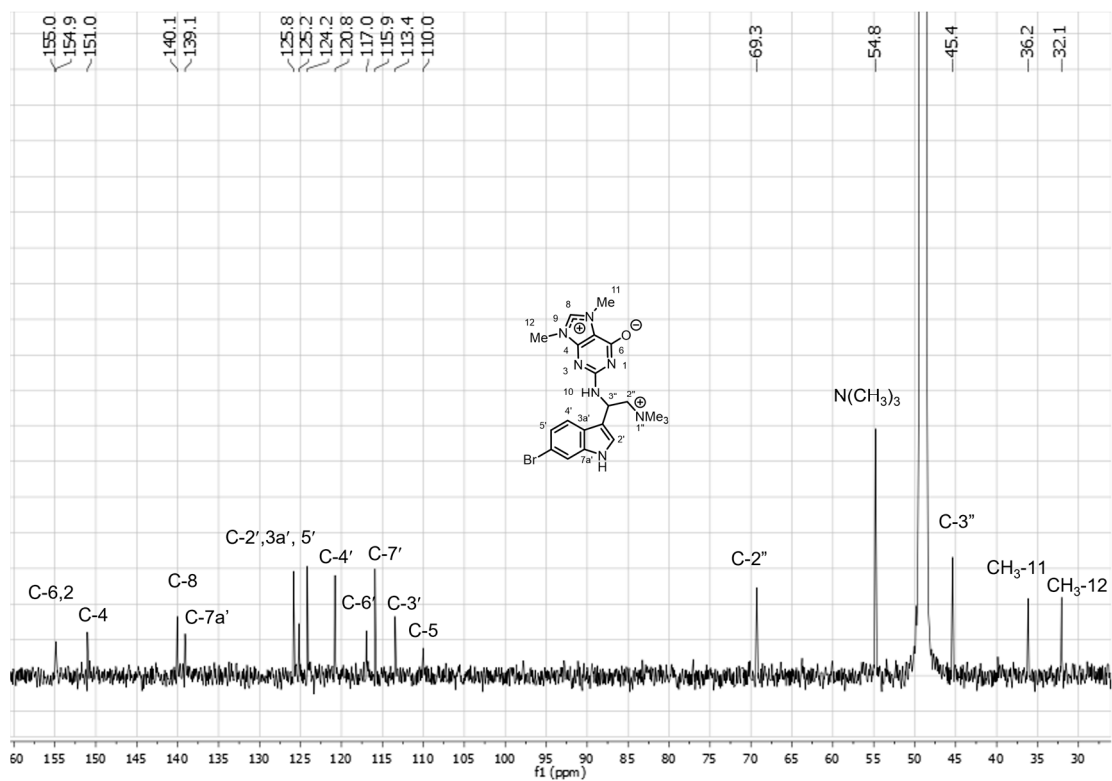

**Figure S2.** <sup>13</sup>C NMR spectrum of geobarrettin D (**1**), recorded in CD<sub>3</sub>OD, 150 MHz.

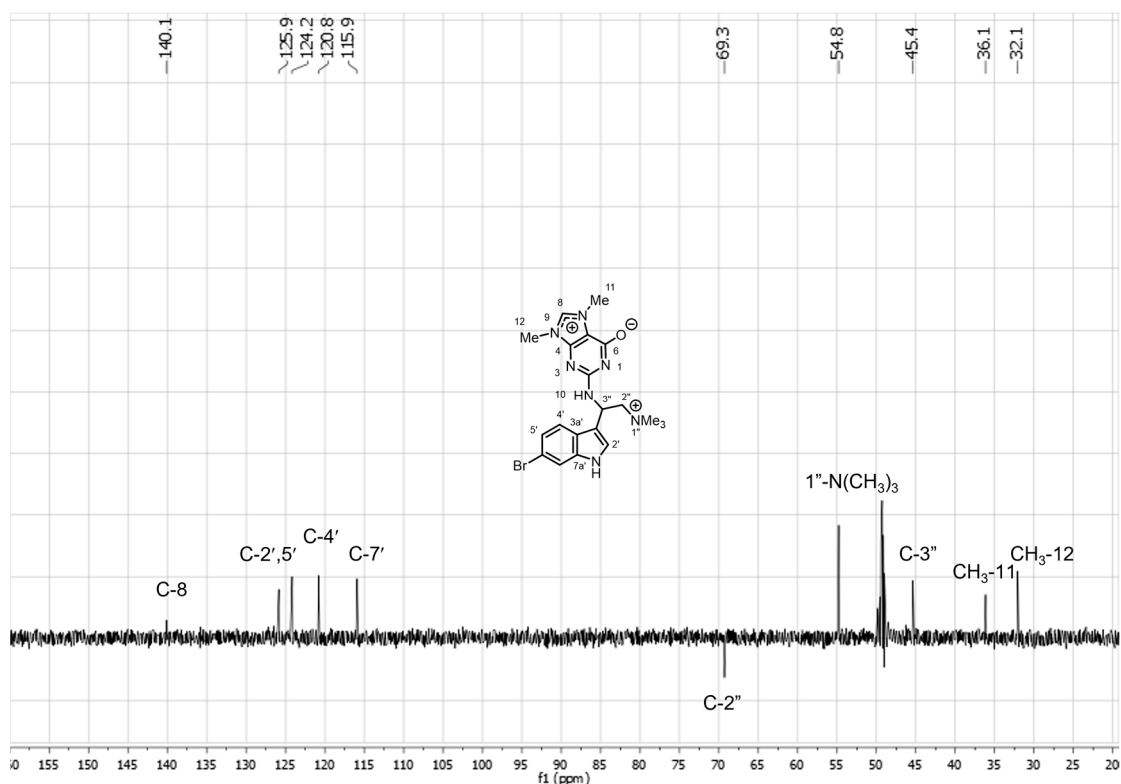

**Figure S3.** DEPT-135 NMR spectrum of geobarrettin D (1).

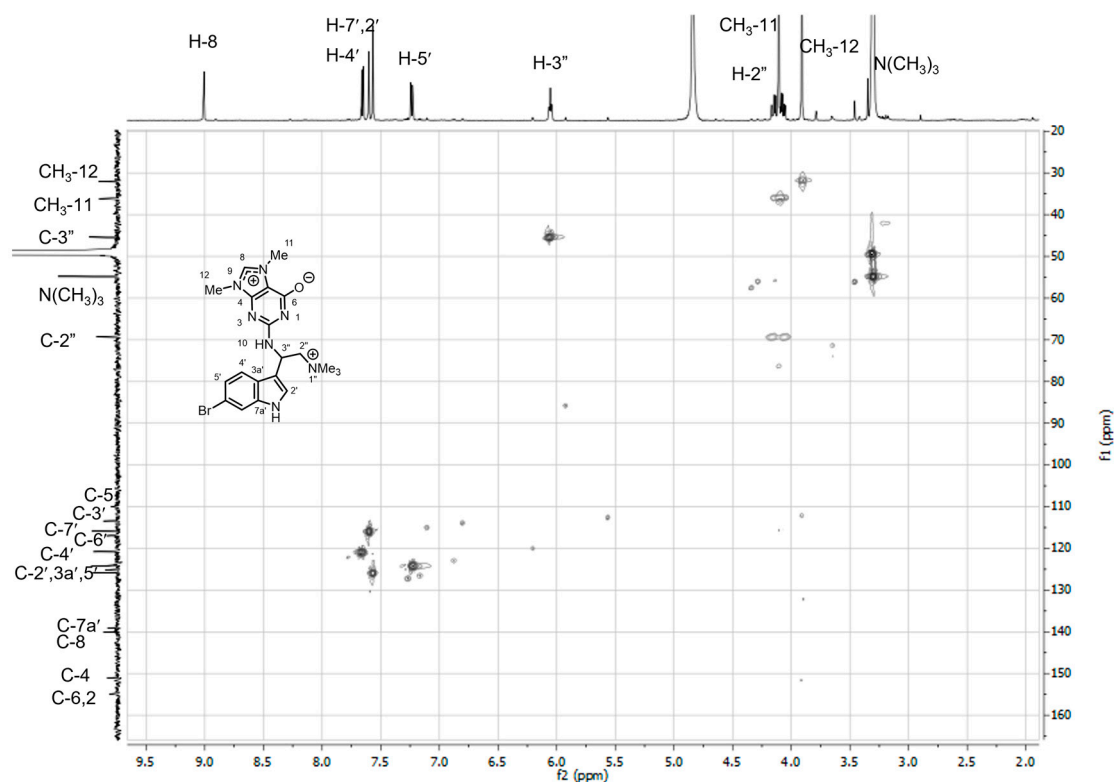

**Figure S4.** HSQC spectrum of geobarrettin D (1).

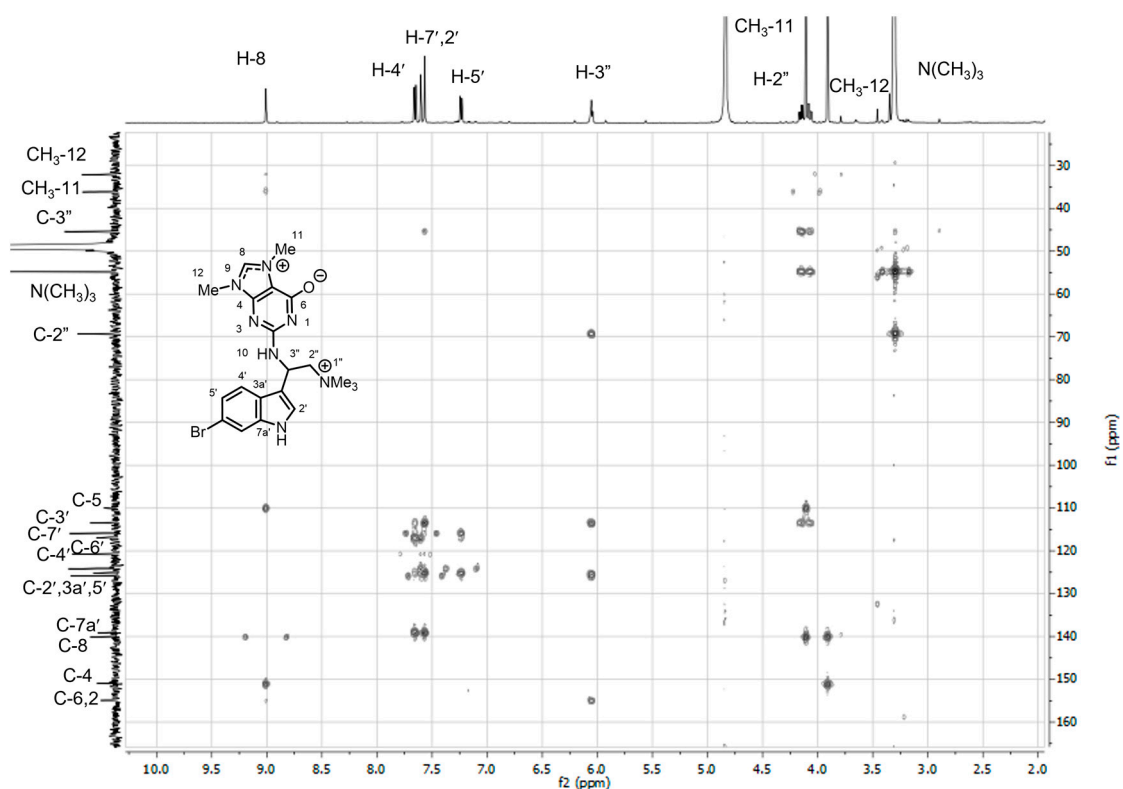

Figure S5. HMBC spectrum of geobarrettin D (1).

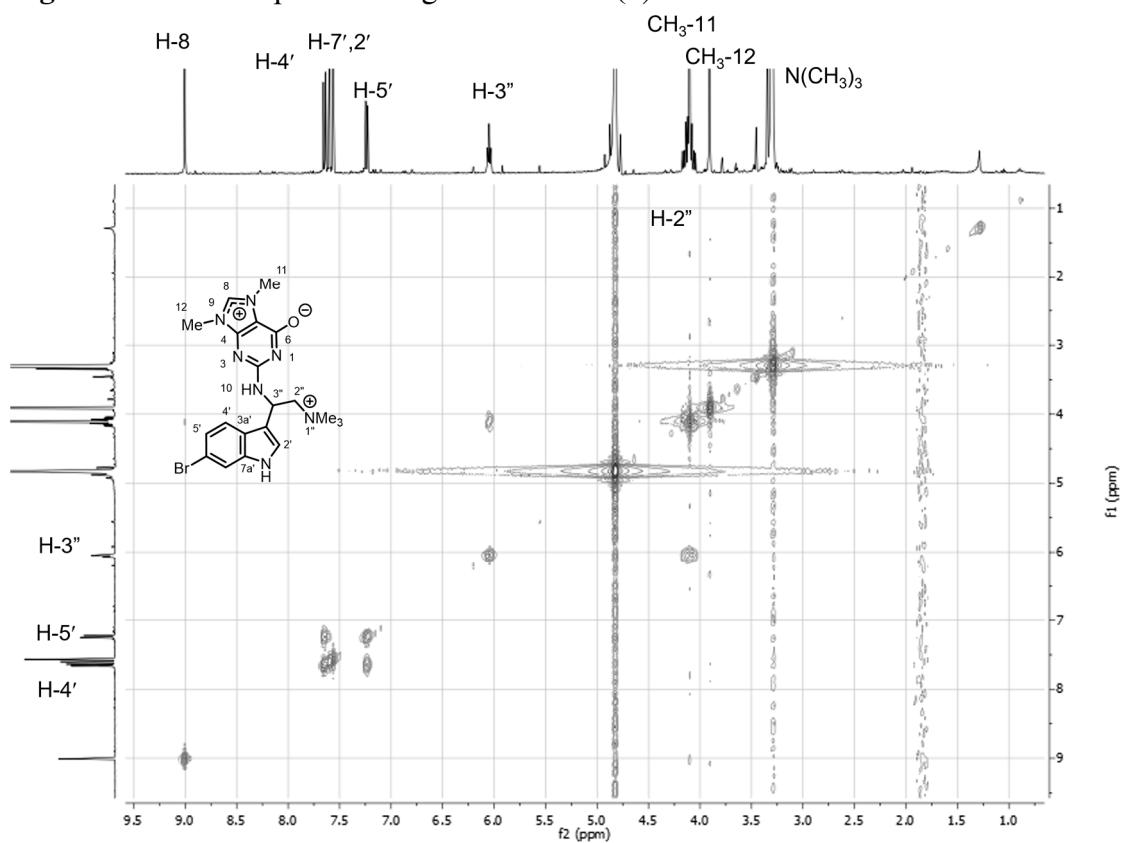

Figure S6. COSY spectrum of geobarrettin D (1).

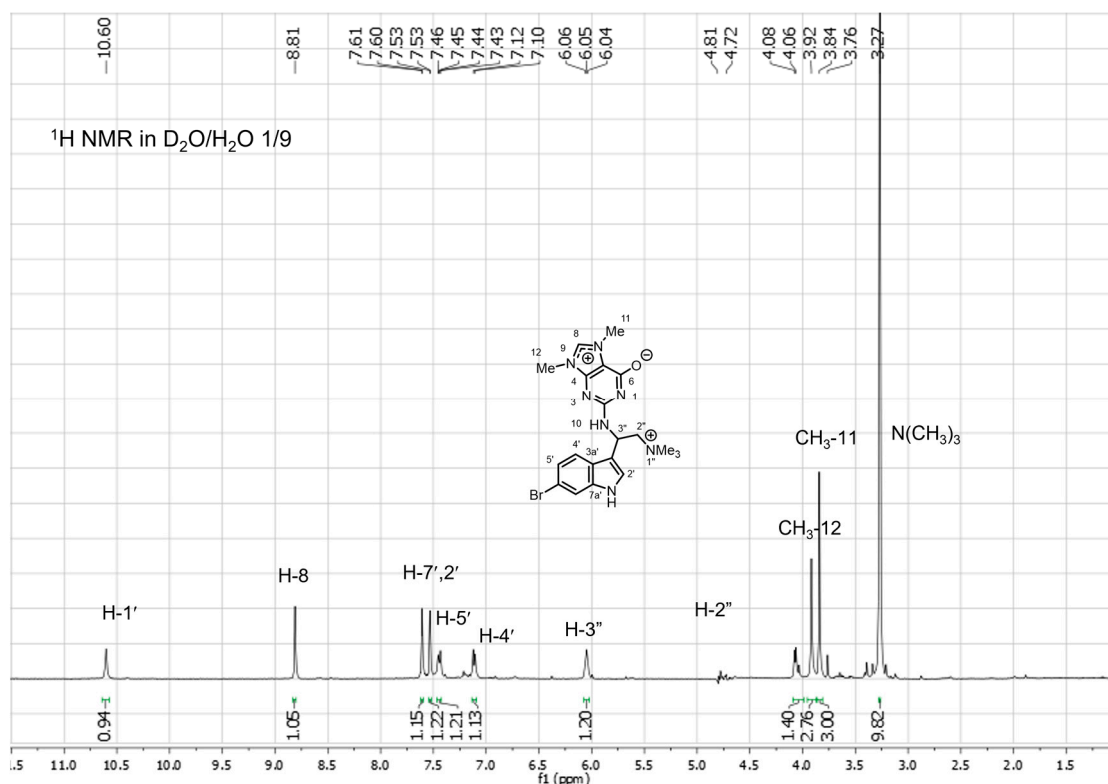

**Figure S7.**  $^1\text{H}$  NMR spectrum of geobarrettin D (1), recorded in  $\text{D}_2\text{O}/\text{H}_2\text{O}$  10/90, 600 MHz.

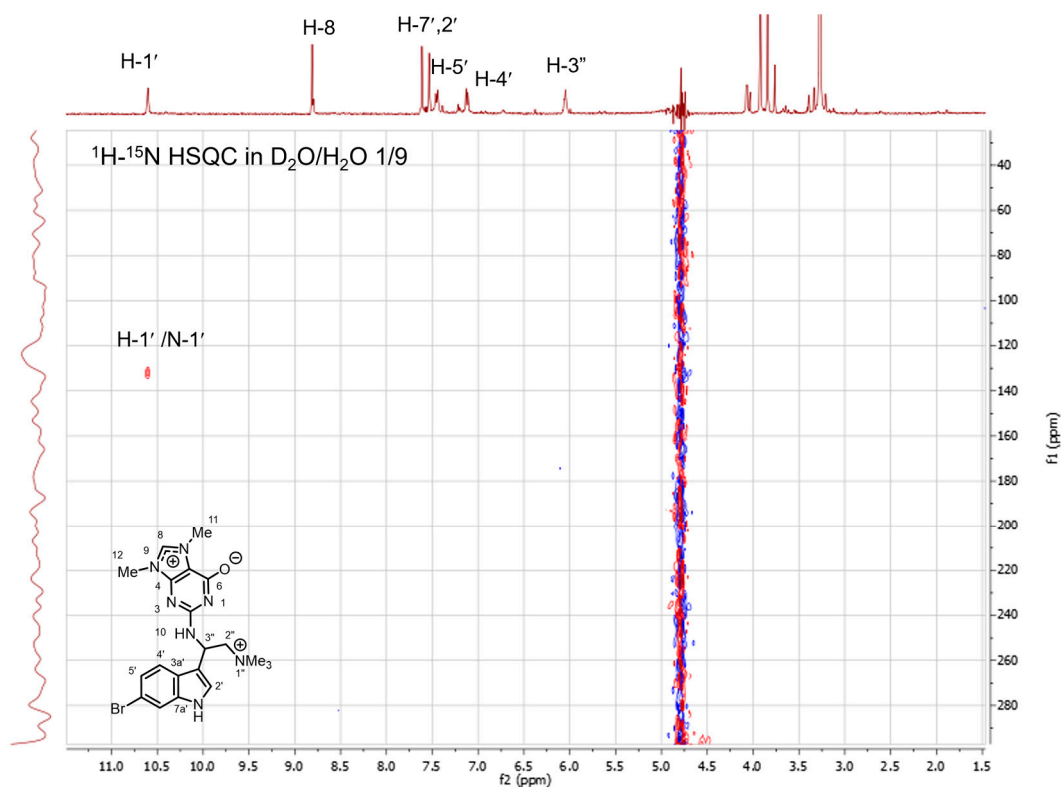

**Figure S8.**  $^1\text{H}$ - $^{15}\text{N}$  HSQC spectrum of geobarrettin D (1), recorded in  $\text{D}_2\text{O}/\text{H}_2\text{O}$  10/90.

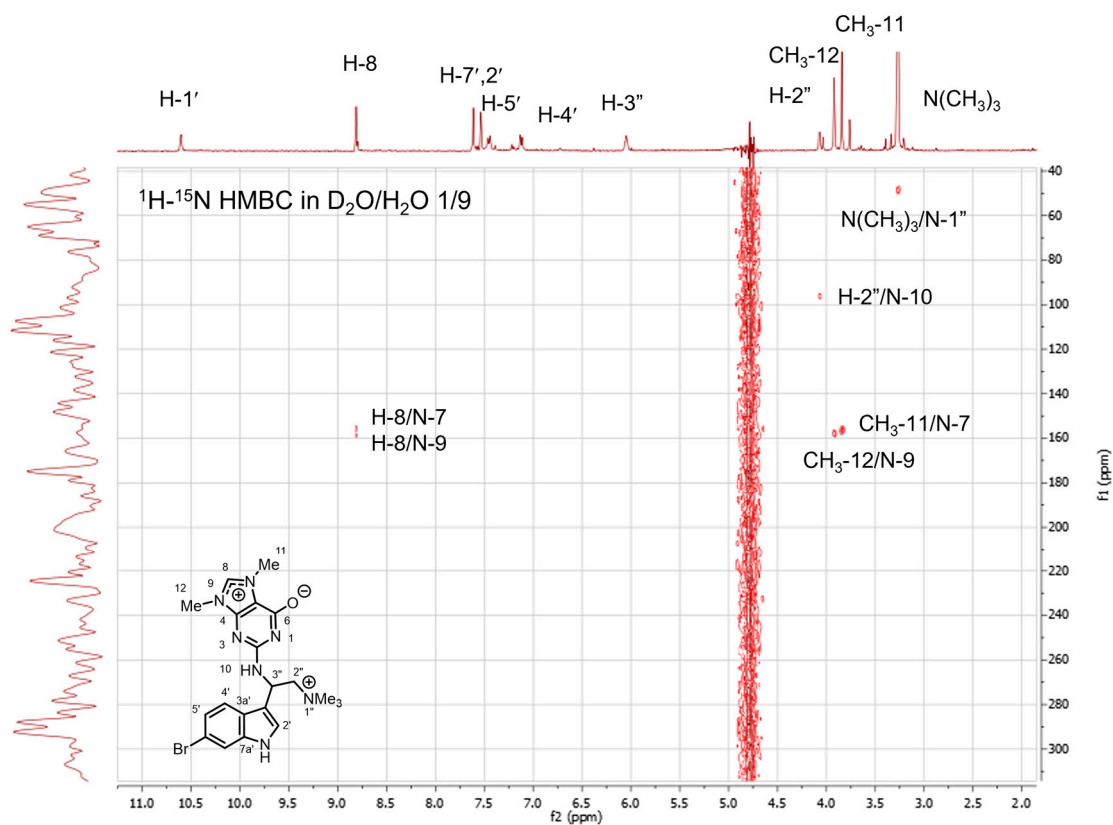

**Figure S9.** <sup>1</sup>H-<sup>15</sup>N HMBC spectrum of geobarrettin D (**1**), recorded in D<sub>2</sub>O/H<sub>2</sub>O 10/90.

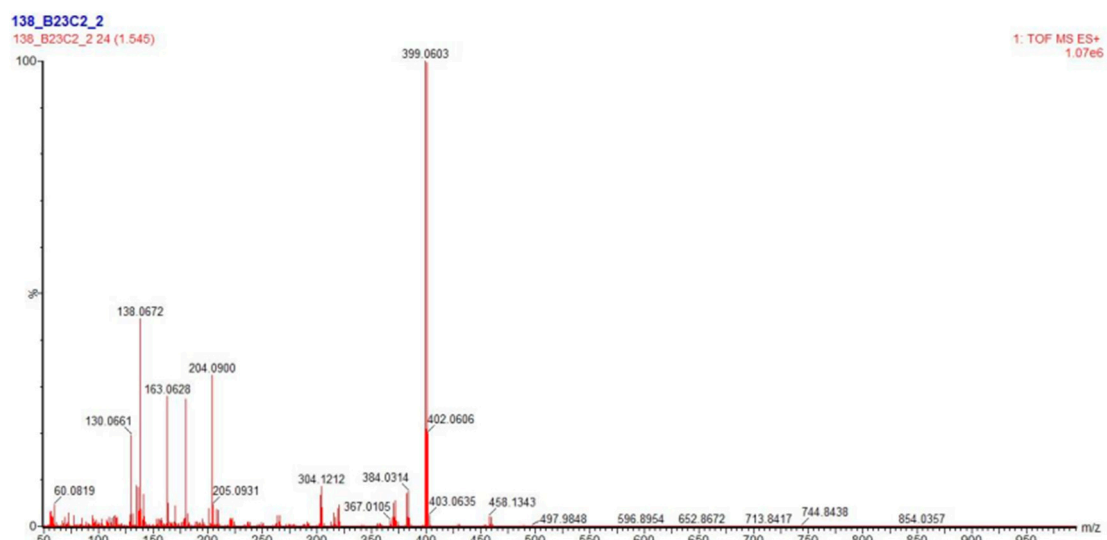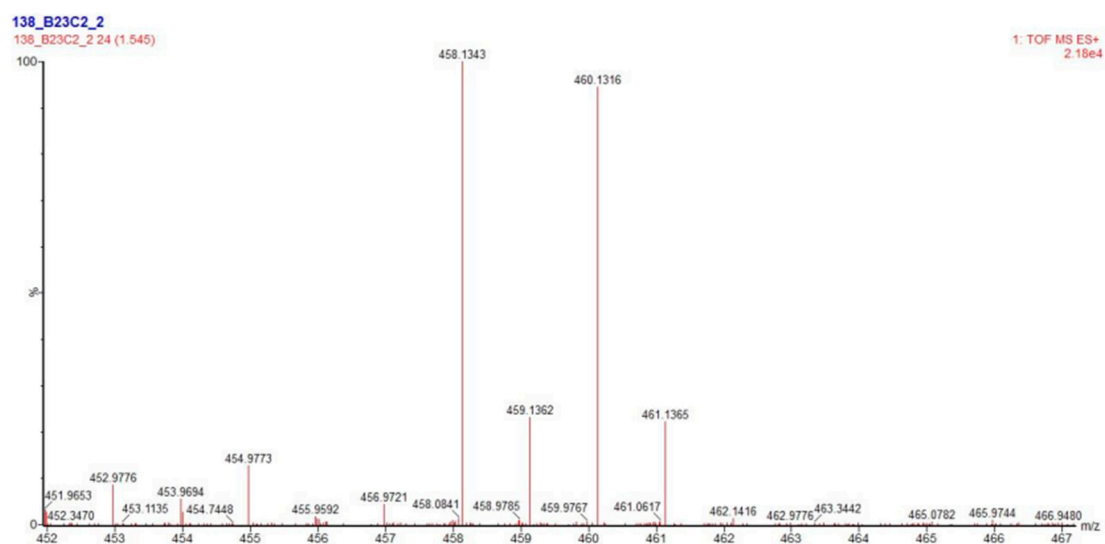

**Figure S10.** ESI spectrum of geobarrettin D (**1**)



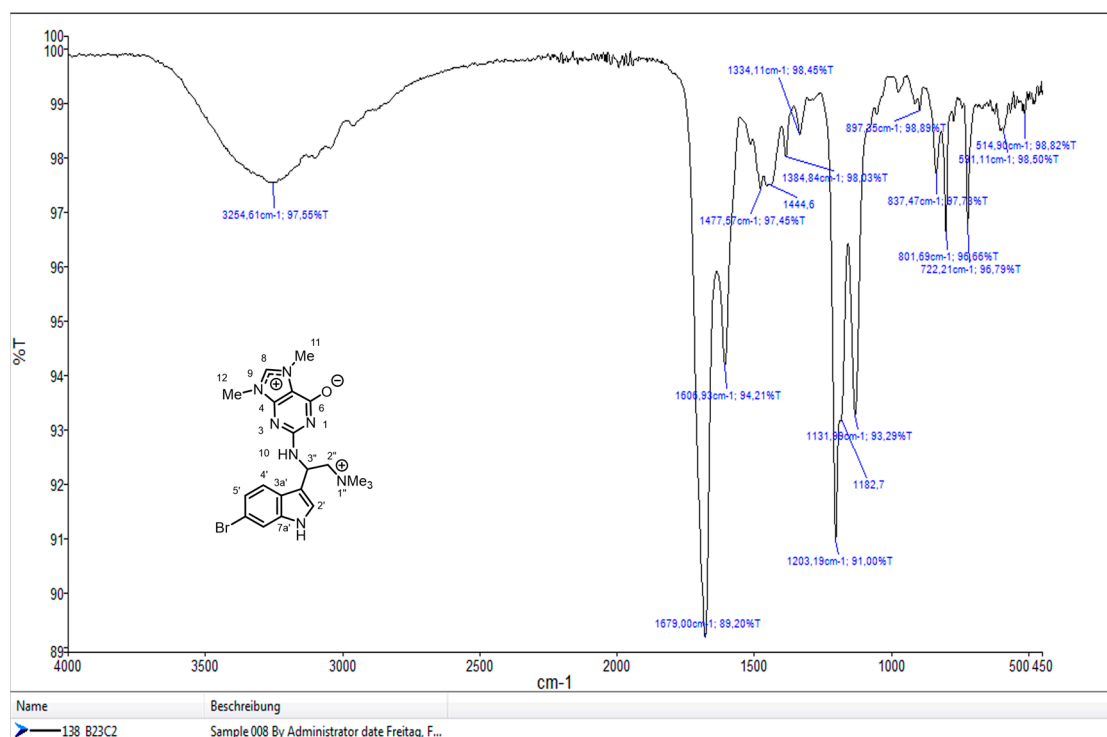

**Figure S11.** IR spectrum of geobarrettin D (1)
